# Supplementary figures and images for: New Phage-Derived Antibacterial Enzyme PolaR Targeting Rothia spp.
Source: MDPI journal article supplement (doi:10.3390/cells12151997), 2023-08-04

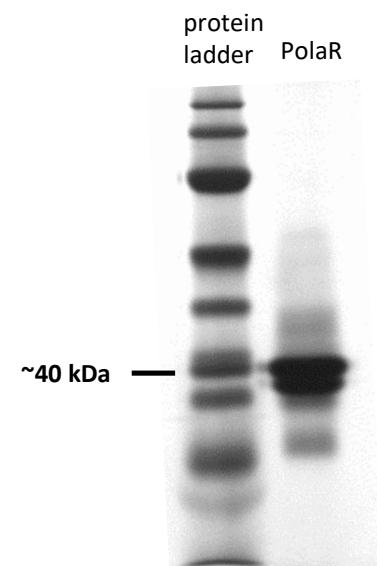

Supplement: s1 [file s1]

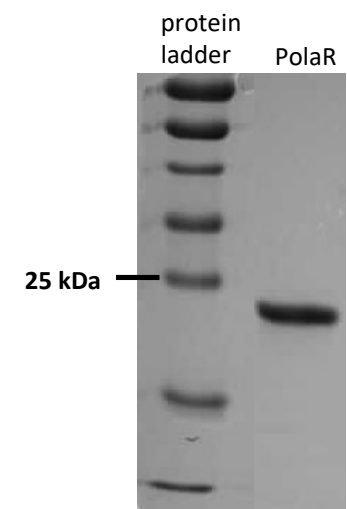

Supplement: s1 [file s1]
